# Supplementary material
Source: PubMed Central journal article supplement (PMC3995140)

## rs12197388 ( CEU )

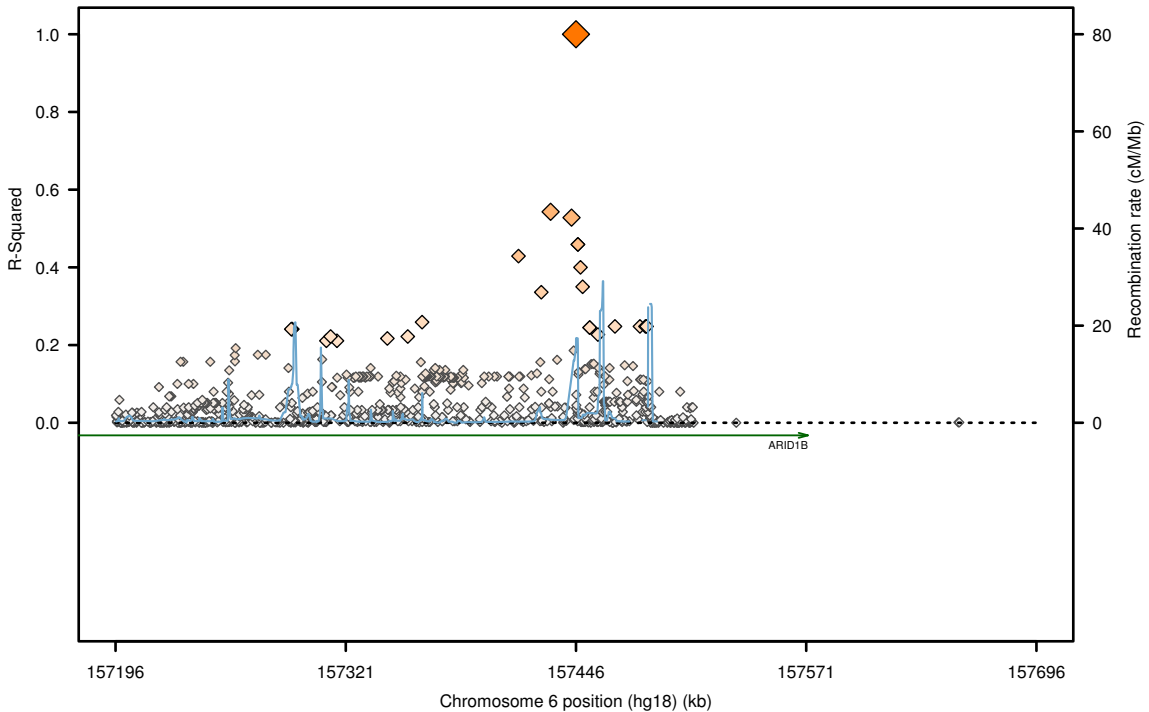

Supplement: NIHMS567528-supplement-Supp_Fig_2.pdf [file NIHMS567528-supplement-Supp_Fig_2.pdf]

## rs10483028 (CEU)

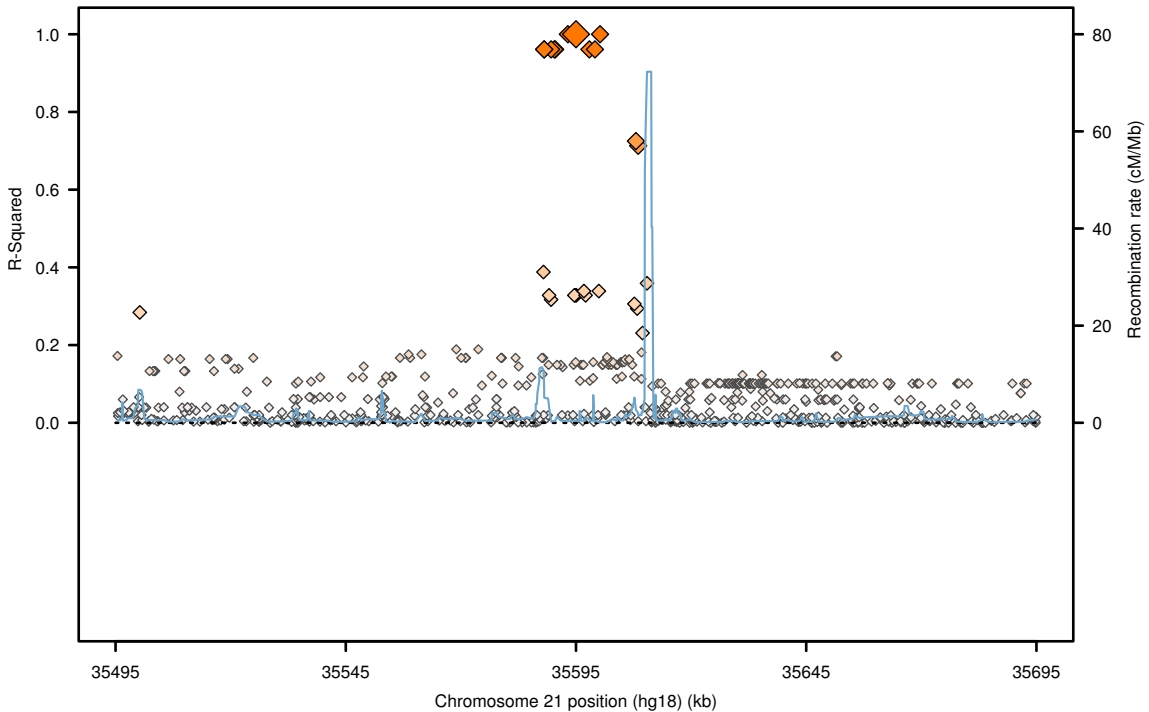

Supplement: NIHMS567528-supplement-Supp_Fig_3.pdf [file NIHMS567528-supplement-Supp_Fig_3.pdf]
